# Supplementary material
Source: Research Square preprint supplement (doi:10.21203/rs.3.rs-9203950/v1)
Supplement: Supplementary file 1 [file da74dea5fc2bc887523c7acf.pdf]

# Application of deep learning to estimate blue and fin whale call density in the southern California Current Ecosystem

Michaela N. Alksne<sup>1</sup>, Marie A. Roch<sup>2</sup>, Kaitlin E. Frasier<sup>1</sup>, John A. Hildebrand<sup>1</sup>, Shane Andres<sup>1</sup>, Dolapo Adesanya<sup>1</sup>, Lauren M. Baggett<sup>1</sup>, Joshua M. Jones<sup>1</sup>, Xiaobai Liu<sup>2</sup>, Ana Širović<sup>3</sup>, Xixin Zhang<sup>2</sup>, Joshua Zingale<sup>2</sup>, and Simone Baumann-Pickering<sup>1</sup>

<sup>1</sup>University of California San Diego, Scripps Institution of Oceanography, San Diego, 92093, USA

<sup>2</sup>San Diego State University, Department of Computer Science, San Diego, 92182, California, USA

<sup>3</sup>Norwegian University of Science and Technology, Department of Biology, Trondheim, 7034, Norway

## ABSTRACT

See main manuscript.

**Supplementary Table S 1.** Summary of CalCOFI sonobuoy survey cruises included in analysis. Recording hours reflect the total duration of sonobuoy deployments within each cruise.

| Cruise ID | Year | Season | Start  | End    | No. Buoys | Recording (hrs) |
|-----------|------|--------|--------|--------|-----------|-----------------|
| CC0403    | 2004 | Spring | 23-Mar | 08-Apr | 24        | 61.7            |
| CC0407    | 2004 | Summer | 13-Jul | 24-Jul | 22        | 54.2            |
| CC0411    | 2004 | Fall   | 03-Nov | 18-Nov | 38        | 128.1           |
| CC0501    | 2005 | Winter | 04-Jan | 18-Jan | 27        | 61.1            |
| CC0504    | 2005 | Spring | 15-Apr | 30-Apr | 31        | 83.8            |
| CC0507    | 2005 | Summer | 02-Jul | 16-Jul | 32        | 79.8            |
| CC0511    | 2005 | Fall   | 05-Nov | 20-Nov | 26        | 39.8            |
| CC0604    | 2006 | Spring | 02-Apr | 16-Apr | 29        | 62.2            |
| CC0607    | 2006 | Summer | 09-Jul | 24-Jul | 36        | 73.6            |
| CC0610    | 2006 | Fall   | 22-Oct | 04-Nov | 27        | 58.2            |
| CC0701    | 2007 | Winter | 13-Jan | 30-Jan | 24        | 105.2           |
| CC0703    | 2007 | Spring | 28-Mar | 14-Apr | 27        | 56.1            |
| CC0706    | 2007 | Summer | 29-Jun | 13-Jul | 27        | 57.5            |
| CC0711    | 2007 | Fall   | 03-Nov | 18-Nov | 23        | 49.5            |
| CC0803    | 2008 | Spring | 25-Mar | 05-Apr | 18        | 35.6            |
| CC0808    | 2008 | Summer | 15-Aug | 29-Aug | 31        | 67.7            |
| CC0810    | 2008 | Fall   | 15-Oct | 29-Oct | 19        | 29.8            |
| CC0901    | 2009 | Winter | 22-Jan | 21-Jan | 30        | 68.9            |
| CC0903    | 2009 | Spring | 08-Mar | 22-Mar | 28        | 56.3            |
| CC0907    | 2009 | Summer | 15-Jul | 30-Jul | 36        | 155.5           |
| CC1001    | 2010 | Winter | 13-Jan | 31-Jan | 20        | 55.9            |
| CC1004    | 2010 | Spring | 12-Apr | 16-Apr | 12        | 28.6            |
| CC1007    | 2010 | Summer | 31-Jul | 15-Aug | 22        | 94.9            |
| CC1010    | 2010 | Fall   | 29-Oct | 12-Nov | 20        | 56.0            |
| CC1101    | 2011 | Winter | 13-Jan | 28-Jan | 27        | 70.8            |
| CC1104    | 2011 | Spring | 10-Apr | 27-Apr | 29        | 55.0            |
| CC1107    | 2011 | Summer | 27-Jul | 12-Aug | 33        | 73.0            |
| CC1110    | 2011 | Fall   | 17-Oct | 30-Oct | 19        | 75.9            |

*Continued on next page*

Table 1 continued

| <b>Cruise ID</b>          | <b>Year</b> | <b>Season</b> | <b>Start</b> | <b>End</b> | <b>No. Buoys</b> | <b>Recording (hrs)</b> |
|---------------------------|-------------|---------------|--------------|------------|------------------|------------------------|
| CC1201                    | 2012        | Winter        | 28-Jan       | 12-Feb     | 23               | 119.5                  |
| CC1203                    | 2012        | Spring        | 25-Mar       | 06-Apr     | 25               | 47.8                   |
| CC1207                    | 2012        | Summer        | 10-Jul       | 26-Jul     | 29               | 136.9                  |
| CC1210                    | 2012        | Fall          | 20-Oct       | 03-Nov     | 26               | 63.0                   |
| CC1301                    | 2013        | Winter        | 11-Jan       | 25-Jan     | 21               | 89.9                   |
| CC1304                    | 2013        | Spring        | 07-Apr       | 22-Apr     | 21               | 79.3                   |
| CC1307                    | 2013        | Summer        | 07-Jul       | 21-Jul     | 31               | 73.4                   |
| CC1311                    | 2013        | Fall          | 10-Nov       | 24-Nov     | 25               | 82.3                   |
| CC1401                    | 2014        | Winter        | 29-Jan       | 04-Feb     | 12               | 44.3                   |
| CC1404                    | 2014        | Spring        | 02-Apr       | 16-Apr     | 26               | 121.6                  |
| CC1407                    | 2014        | Summer        | 07-Jul       | 21-Jul     | 26               | 72.6                   |
| CC1411                    | 2014        | Fall          | 09-Nov       | 22-Nov     | 27               | 89.2                   |
| CC1501                    | 2015        | Winter        | 16-Jan       | 29-Jan     | 28               | 95.3                   |
| CC1507                    | 2015        | Spring        | 30-Jul       | 30-Jul     | 29               | 77.8                   |
| CC1510                    | 2015        | Fall          | 29-Oct       | 13-Nov     | 28               | 86.7                   |
| CC1601                    | 2016        | Winter        | 08-Jan       | 21-Jan     | 26               | 86.8                   |
| CC1604                    | 2016        | Spring        | 01-Apr       | 14-Apr     | 22               | 78.1                   |
| CC1607                    | 2016        | Summer        | 10-Jul       | 26-Jul     | 28               | 82.0                   |
| CC1611                    | 2016        | Fall          | 07-Nov       | 21-Nov     | 26               | 92.0                   |
| CC1701                    | 2017        | Winter        | 06-Jan       | 20-Jan     | 30               | 103.2                  |
| CC1703                    | 2017        | Spring        | 29-Mar       | 12-Apr     | 29               | 62.0                   |
| CC1708                    | 2017        | Summer        | 02-Aug       | 15-Aug     | 31               | 88.4                   |
| CC1711                    | 2017        | Fall          | 09-Nov       | 23-Nov     | 25               | 57.0                   |
| CC1806                    | 2018        | Summer        | 09-Jun       | 24-Jun     | 30               | 126.8                  |
| CC1902                    | 2019        | Winter        | 07-Feb       | 12-Feb     | 12               | 46.3                   |
| CC1904                    | 2019        | Spring        | 03-Apr       | 16-Apr     | 23               | 73.6                   |
| CC1907                    | 2019        | Summer        | 12-Jul       | 26-Jul     | 30               | 114.7                  |
| CC2107                    | 2021        | Summer        | 19-Jul       | 01-Aug     | 33               | 115.2                  |
| CC2110                    | 2021        | Fall          | 31-Oct       | 14-Nov     | 28               | 100.0                  |
| CC2204                    | 2022        | Spring        | 07-Apr       | 16-Apr     | 17               | 57.7                   |
| CC2208                    | 2022        | Summer        | 16-Aug       | 29-Aug     | 25               | 42.9                   |
| CC2211                    | 2022        | Fall          | 06-Nov       | 19-Nov     | 17               | 53.2                   |
| CC2301                    | 2023        | Winter        | 07-Jan       | 25-Jan     | 36               | 89.7                   |
| CC2303                    | 2023        | Spring        | 26-Mar       | 15-Apr     | 27               | 83.7                   |
| CC2307                    | 2023        | Summer        | 03-Jul       | 17-Jul     | 28               | 62.7                   |
| CC2311                    | 2023        | Fall          | 04-Nov       | 18-Nov     | 27               | 53.0                   |
| CC2401                    | 2024        | Winter        | 11-Jan       | 31-Jan     | 22               | 63.1                   |
| CC2403                    | 2024        | Spring        | 29-Mar       | 07-Apr     | 4                | 17.9                   |
| CC2407                    | 2024        | Summer        | 28-Jul       | 11-Aug     | 40               | 150.5                  |
| CC2411                    | 2024        | Fall          | 16-Nov       | 23-Nov     | 13               | 29.4                   |
| <b>Total (68 cruises)</b> |             |               |              |            | <b>1743</b>      | <b>5104.3</b>          |

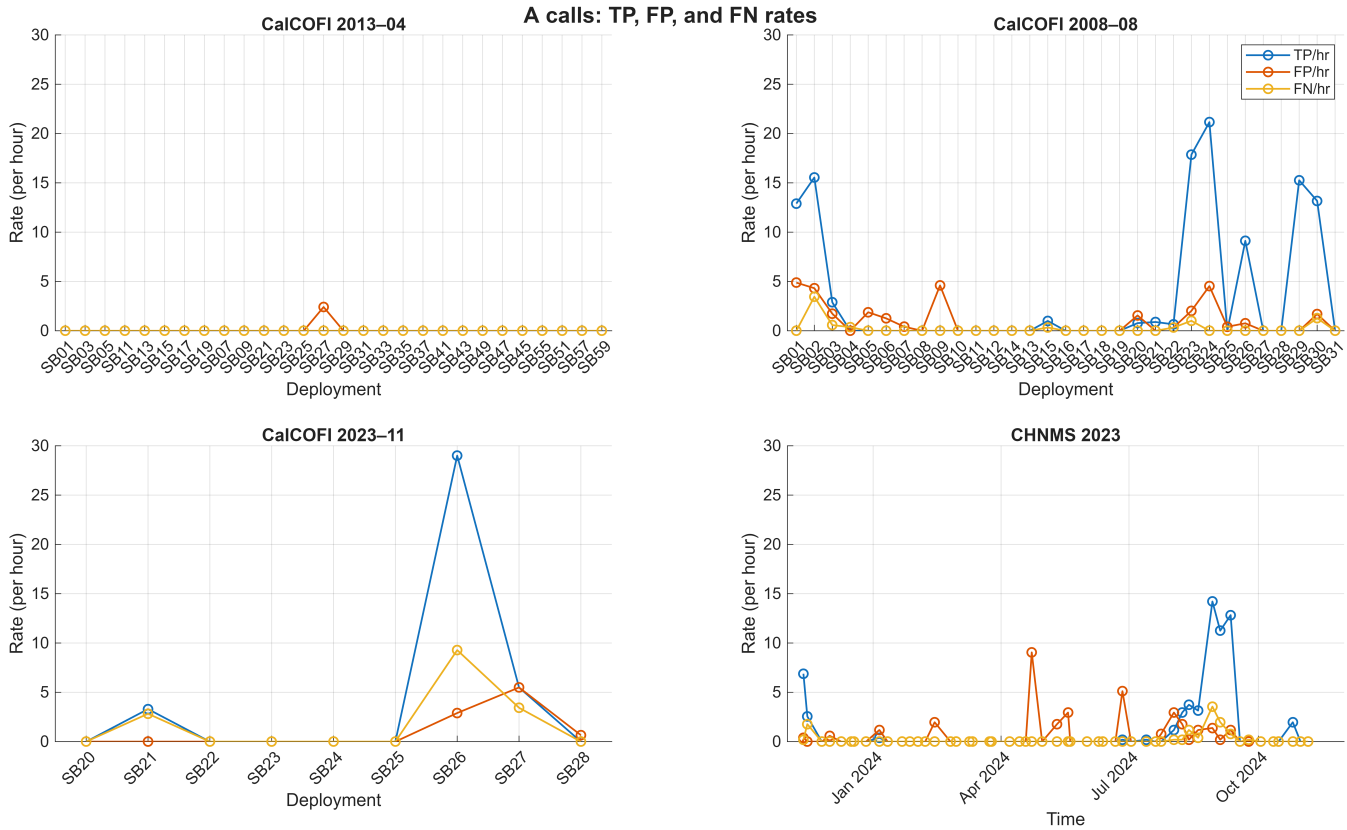

**Supplementary Figure S 1.** True positive, false positive, and false negative rates for A calls across evaluation datasets. Four panels show the rate of true positives (TP/hr), false positives (FP/hr), and false negatives (FN/hr) for A-call detections, standardized by recording effort (counts divided by effort duration in hours) at the deployment/encounter level. CalCOFI datasets (2013–04, 2008–08, 2023–11) are summarized by individual sonobuoy deployment (x-axis labeled by deployment ID), while CHNMS 2023 is summarized over verified encounter windows (5-hrs) through time. Rates are shown as lines with markers to highlight variability in detection outcomes among deployments/encounters and differences in error structure across datasets.

**Supplementary Table S 2.** CalCOFI sonobuoy cruises used for model training and testing. For training, recording hours reflect the total duration of 60-s spectrograms sampled from each cruise (not full deployment durations). For testing, recording hours reflect the full duration of all annotated sonobuoy deployments.

| Cruise ID          | Year | Season | Sonobuoys | Recording (hrs) |
|--------------------|------|--------|-----------|-----------------|
| <i>Training</i>    |      |        |           |                 |
| CC0603             | 2006 | Winter | 1         | 2.00            |
| CC0706             | 2007 | Summer | 12        | 5.37            |
| CC1107             | 2011 | Summer | 1         | 0.32            |
| CC1110             | 2011 | Fall   | 1         | 4.43            |
| CC1301             | 2013 | Winter | 1         | 0.03            |
| CC1307             | 2013 | Summer | 9         | 0.80            |
| CC1311             | 2013 | Fall   | 5         | 0.48            |
| CC1407             | 2014 | Summer | 9         | 6.13            |
| CC1501             | 2015 | Winter | 6         | 14.93           |
| CC1507             | 2015 | Summer | 8         | 3.22            |
| CC1601             | 2016 | Winter | 3         | 4.28            |
| CC1604             | 2016 | Spring | 1         | 1.07            |
| CC1611             | 2016 | Fall   | 1         | 0.02            |
| CC1701             | 2017 | Winter | 2         | 0.13            |
| CC1806             | 2018 | Summer | 5         | 0.15            |
| CC1907             | 2019 | Summer | 3         | 9.97            |
| CC2411             | 2024 | Fall   | 1         | 4.40            |
| <b>Train total</b> |      |        |           | <b>57.73</b>    |
| <i>Testing</i>     |      |        |           |                 |
| CC0808             | 2008 | Summer | 32        | 69.50           |
| CC1304             | 2013 | Spring | 28        | 115.68          |
| CC2311             | 2023 | Fall   | 9         | 16.11           |
| <b>Test total</b>  |      |        |           | <b>201.29</b>   |

**Supplementary Table S 3.** HARP deployments used for model training, validation, and testing. Recording hours reflect the total duration of 60-s spectrograms sampled from each deployment for training and validation, and the full annotated deployment duration for the CHNMS test dataset.

| Station                | Latitude | Longitude | Depth (m) | Deployed   | Recovered  | Role      | Recording (hrs) |
|------------------------|----------|-----------|-----------|------------|------------|-----------|-----------------|
| CINMS01                | 34.28°N  | 120.03°W  | 580       | 2011-10-24 | 2012-03-21 | Train/Val | 0.38            |
| CINMS02                | 34.29°N  | 120.03°W  | 580       | 2012-03-22 | 2012-08-01 | Train/Val | 11.92           |
| CINMS03                | 34.29°N  | 120.02°W  | 900       | 2012-08-02 | 2012-12-03 | Train/Val | 0.57            |
| SOCAL                  | 32.85°N  | 119.18°W  | 1012      | 2008-06-04 | 2008-08-03 | Train/Val | 28.03           |
| DC                     | 35.61°N  | 121.24°W  | 65        | 2012-11-06 | 2013-03-19 | Train/Val | 68.40           |
| CHNMS                  | 34.57°N  | 120.71°W  | 73        | 2023-11-06 | 2024-11-06 | Test      | 269.17          |
| <b>Train/Val total</b> |          |           |           |            |            |           | <b>109.30</b>   |
| <b>Test total</b>      |          |           |           |            |            |           | <b>269.17</b>   |

**Supplementary Table S 4.** Detection areas by call type at each modeled CalCOFI station. Inshore stations (86.7–60, 93.3–35, 90.0–37, 76.7–55, 86.7–35, 81.8–46.9, and 83.3–55) are located inshore of the continental slope; offshore stations (83.3–110, 90.0–90, and 83.3–70) are located offshore of the continental slope.

| Station                  | Latitude | Longitude | A (km <sup>2</sup> ) | B (km <sup>2</sup> ) | D (km <sup>2</sup> ) | 20 Hz (km <sup>2</sup> ) | 40 Hz (km <sup>2</sup> ) |
|--------------------------|----------|-----------|----------------------|----------------------|----------------------|--------------------------|--------------------------|
| <i>Inshore stations</i>  |          |           |                      |                      |                      |                          |                          |
| 86.7–60                  | 32.99°N  | 120.35°W  | 21,646               | 24,954               | 26,418               | 24,915                   | 25,617                   |
| 93.3–35                  | 32.68°N  | 117.87°W  | 18,484               | 21,746               | 22,480               | 21,431                   | 22,196                   |
| 90.0–37                  | 33.18°N  | 118.39°W  | 13,349               | 13,842               | 14,507               | 13,855                   | 14,253                   |
| 76.7–55                  | 34.89°N  | 121.20°W  | 11,619               | 12,848               | 13,638               | 12,564                   | 12,986                   |
| 86.7–35                  | 33.82°N  | 118.63°W  | 8,006                | 8,661                | 9,402                | 8,494                    | 8,802                    |
| 81.8–46.9                | 34.27°N  | 120.03°W  | 4,629                | 4,813                | 4,916                | 4,824                    | 4,874                    |
| 83.3–55                  | 33.75°N  | 120.41°W  | 17,238               | 20,127               | 21,819               | 20,115                   | 20,971                   |
| <i>Offshore stations</i> |          |           |                      |                      |                      |                          |                          |
| 83.3–110                 | 31.91°N  | 124.17°W  | 38,427               | 40,095               | 40,798               | 40,267                   | 40,576                   |
| 90.0–90                  | 31.42°N  | 122.00°W  | 37,712               | 39,644               | 40,389               | 39,703                   | 40,283                   |
| 83.3–70                  | 33.25°N  | 121.44°W  | 35,880               | 37,475               | 38,512               | 38,096                   | 38,168                   |

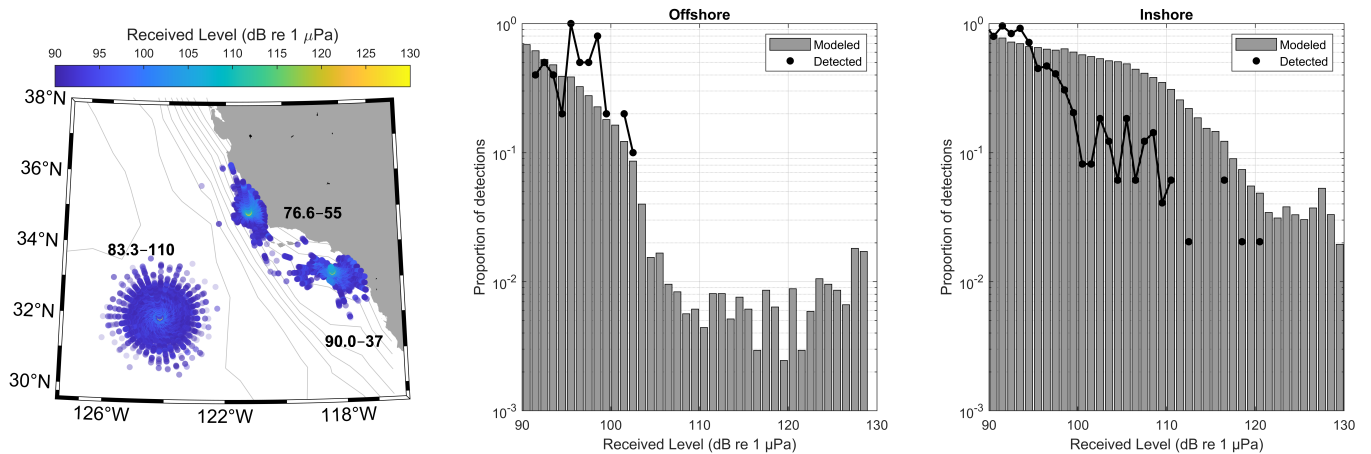

**Supplementary Figure S 2.** Received level distributions for blue whale A calls used for density estimation. Left: Modeled received levels (dB re 1  $\mu$ Pa) across the southern California Current Ecosystem for representative offshore and inshore stations. Center and right: Distributions of received levels for detected calls in offshore (center) and inshore (right) environments. Gray bars show modeled received level distributions from propagation modeling, while black points show received levels from detected calls.

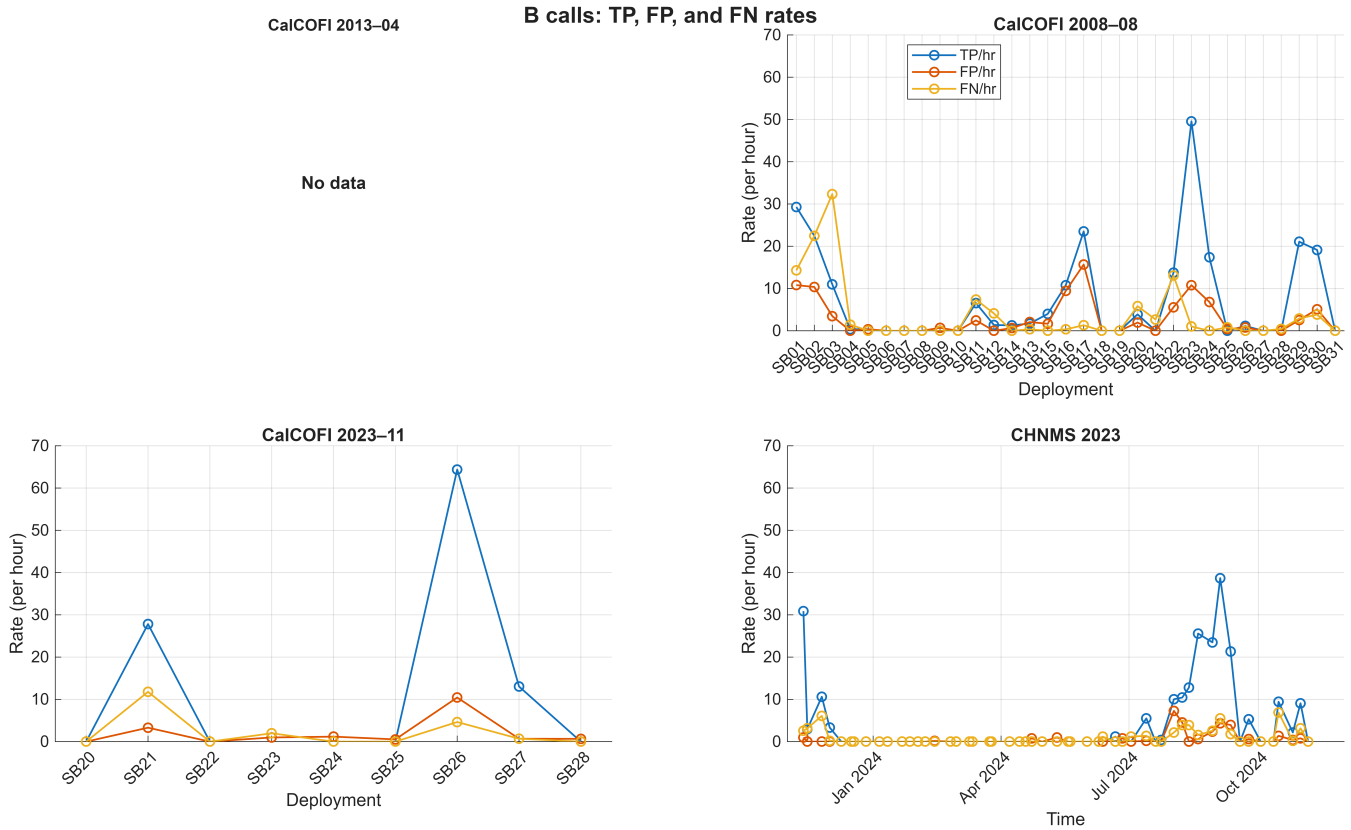

**Supplementary Figure S 3.** True positive, false positive, and false negative rates for B calls across evaluation datasets. Four panels show the rate of true positives (TP/hr), false positives (FP/hr), and false negatives (FN/hr) for B-call detections, standardized by recording effort (counts divided by effort duration in hours) at the deployment/encounter level. CalCOFI datasets (2013–04, 2008–08, 2023–11) are summarized by individual sonobuoy deployment (x-axis labeled by deployment ID), while CHNMS 2023 is summarized over verified encounter windows (5-hrs) through time. Rates are shown as lines with markers to highlight variability in detection outcomes among deployments/encounters and differences in error structure across datasets.

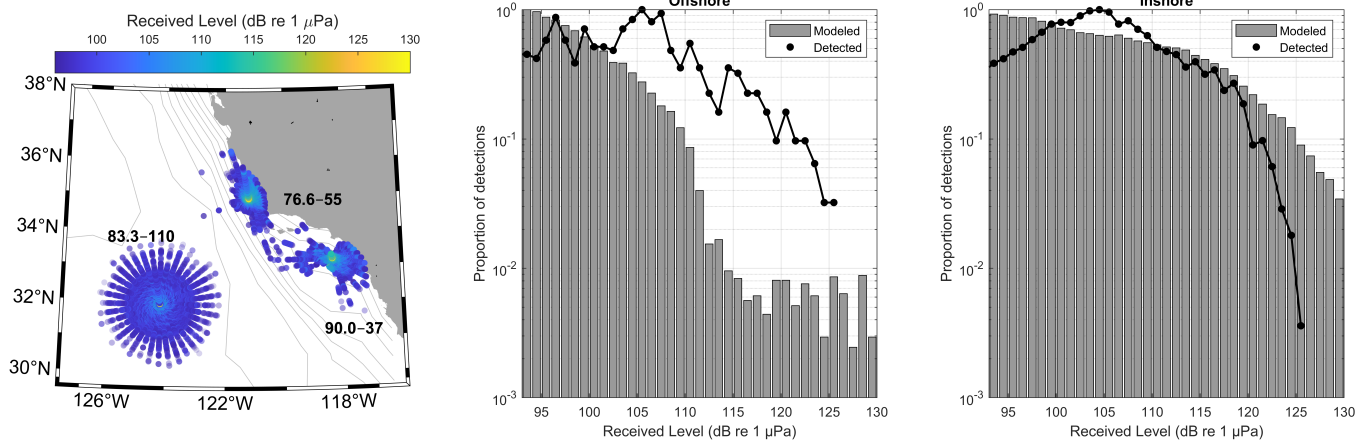

**Supplementary Figure S 4.** Received level distributions for blue whale B calls used for density estimation. Left: Modeled received levels (dB re 1  $\mu$ Pa) across the southern California Current Ecosystem for representative offshore and inshore stations. Center and right: Distributions of received levels for detected calls in offshore (center) and inshore (right) environments. Gray bars show modeled received level distributions from propagation modeling, while black points show received levels from detected calls.

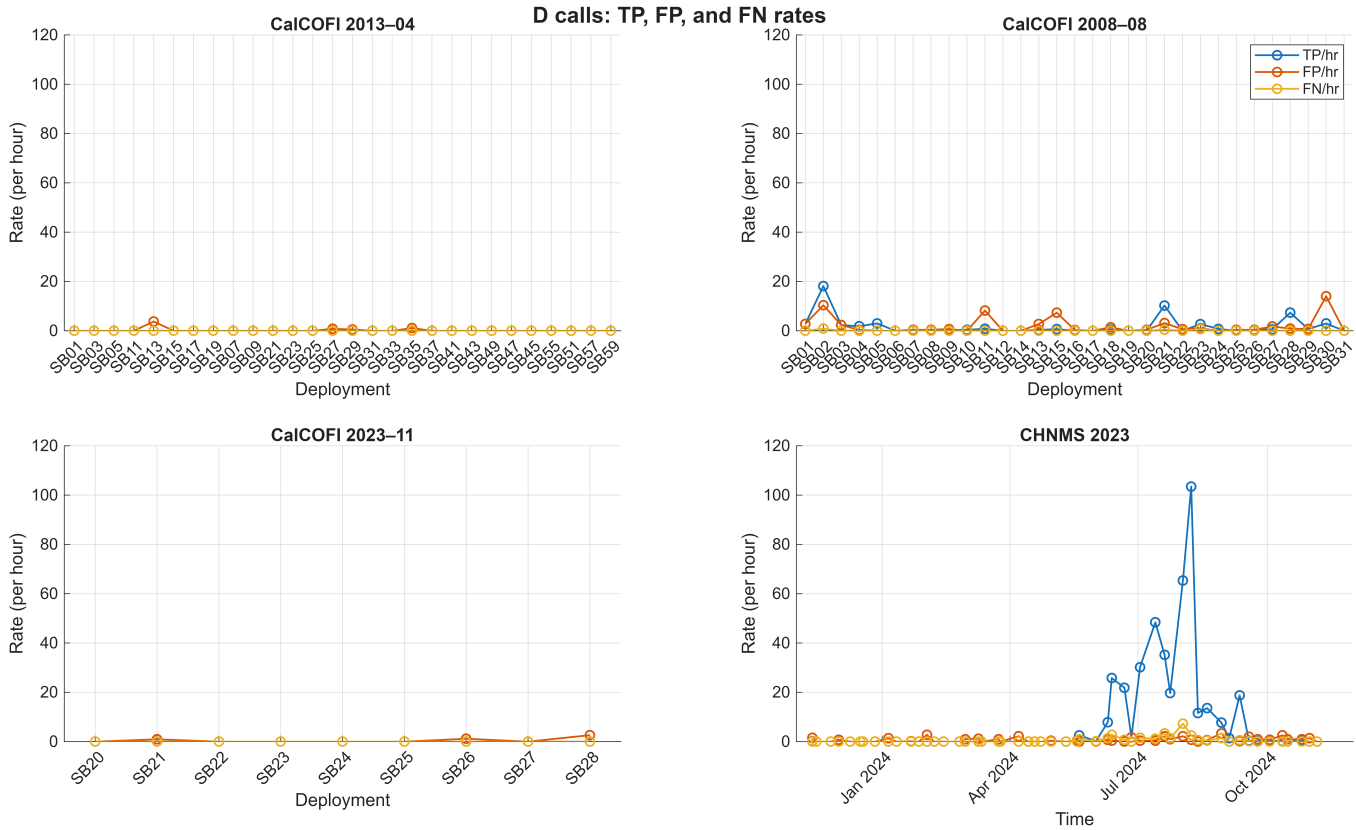

**Supplementary Figure S 5.** True positive, false positive, and false negative rates for D calls across evaluation datasets. Four panels show the rate of true positives (TP/hr), false positives (FP/hr), and false negatives (FN/hr) for D-call detections, standardized by recording effort (counts divided by effort duration in hours) at the deployment/encounter level. CalCOFI datasets (2013–04, 2008–08, 2023–11) are summarized by individual sonobuoy deployment (x-axis labeled by deployment ID), while CHNMS 2023 is summarized over verified encounter windows (5-hrs) through time. Rates are shown as lines with markers to highlight variability in detection outcomes among deployments/encounters and differences in error structure across datasets.

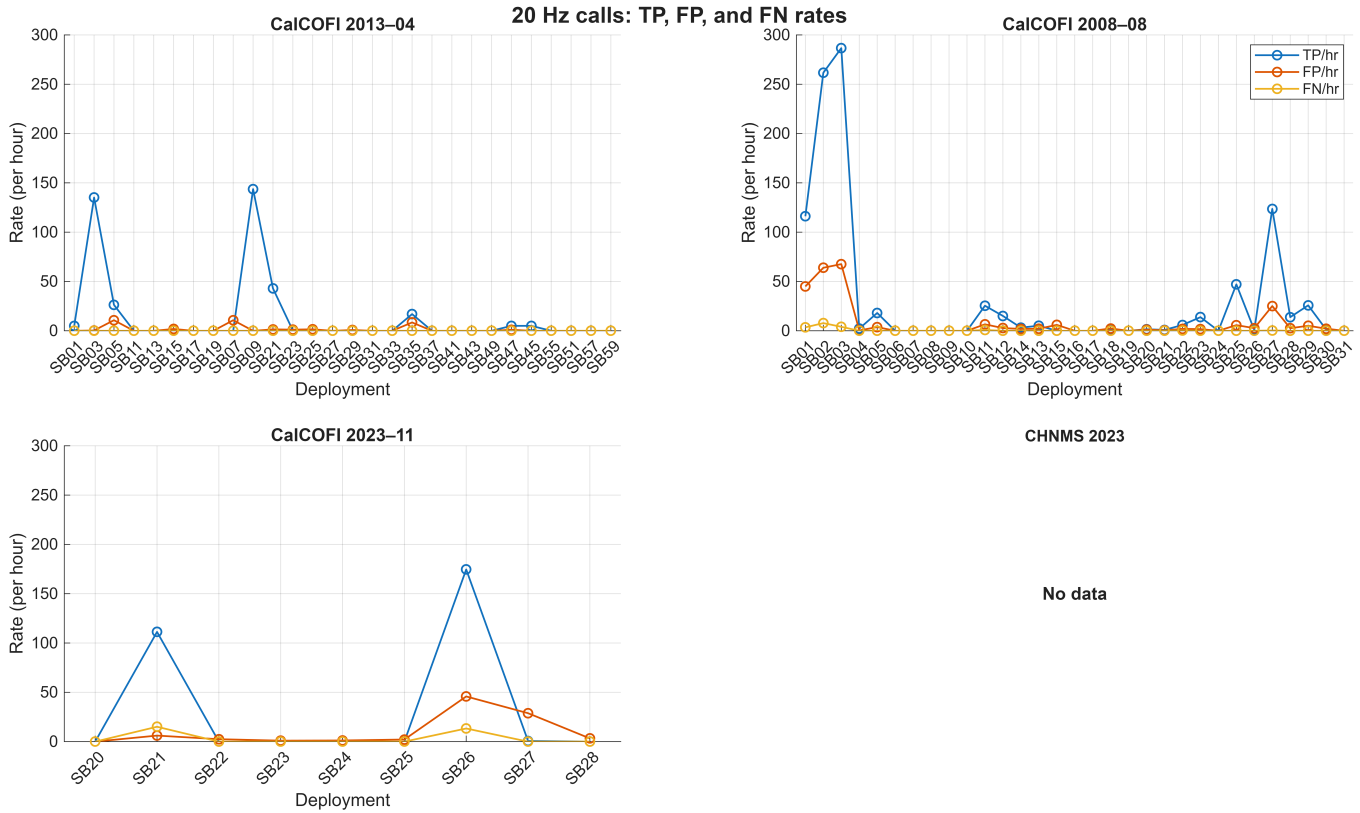

**Supplementary Figure S 6.** True positive, false positive, and false negative rates for 20 Hz calls across evaluation datasets. Four panels show the rate of true positives (TP/hr), false positives (FP/hr), and false negatives (FN/hr) for 20 Hz-call detections, standardized by recording effort (counts divided by effort duration in hours) at the deployment/encounter level. CalCOFI datasets (2013–04, 2008–08, 2023–11) are summarized by individual sonobuoy deployment (x-axis labeled by deployment ID), while CHNMS 2023 is summarized over verified encounter windows (5-hrs) through time. Rates are shown as lines with markers to highlight variability in detection outcomes among deployments/encounters and differences in error structure across datasets.

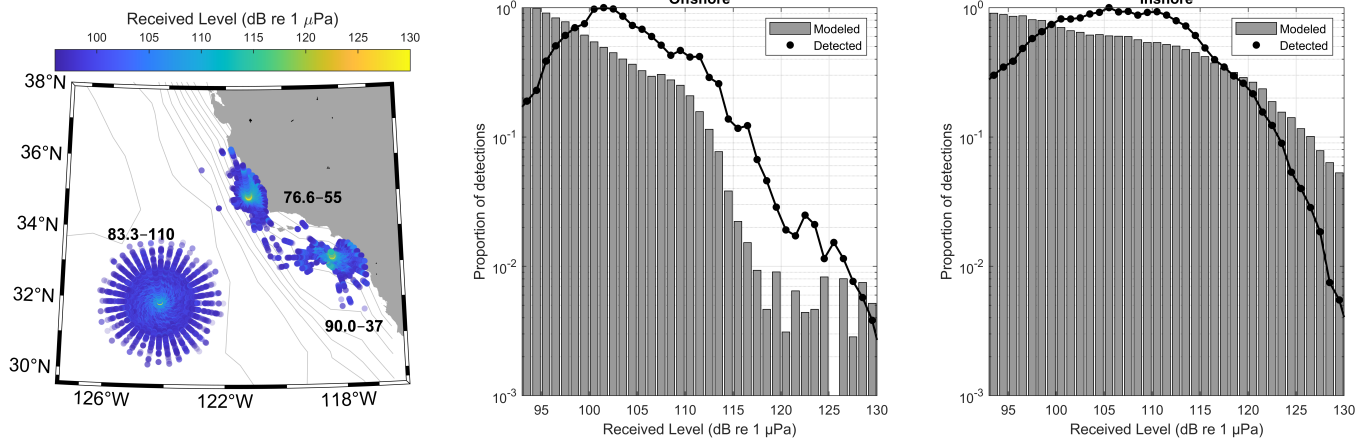

**Supplementary Figure S 7.** Received level distributions for fin whale 20 Hz calls used for density estimation. Left: Modeled received levels (dB re 1  $\mu$ Pa) across the southern California Current Ecosystem for representative offshore and inshore stations. Center and right: Distributions of received levels for detected calls in offshore (center) and inshore (right) environments. Gray bars show modeled received level distributions from propagation modeling, while black points show received levels from detected calls.

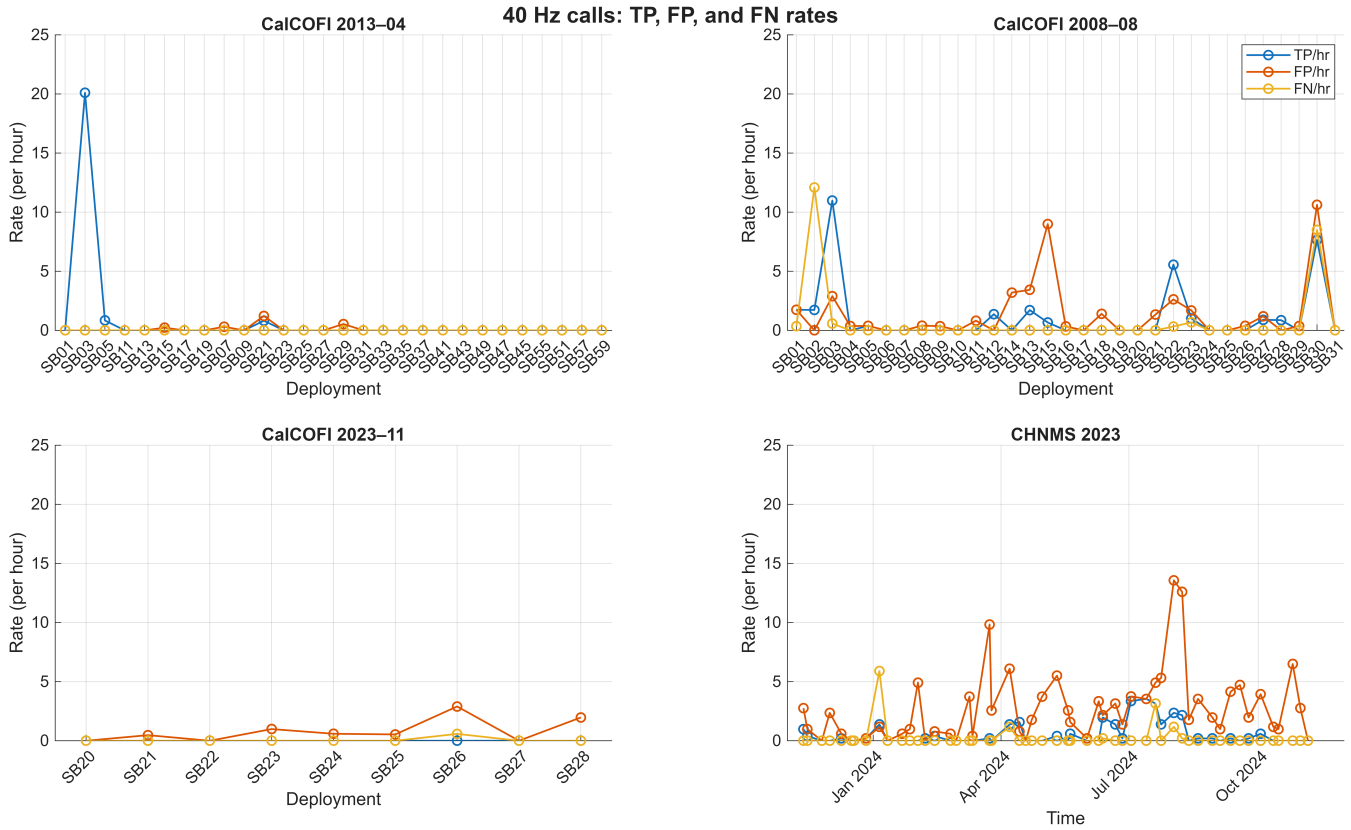

**Supplementary Figure S 8.** True positive, false positive, and false negative rates for 40 Hz calls across evaluation datasets. Four panels show the rate of true positives (TP/hr), false positives (FP/hr), and false negatives (FN/hr) for 40 Hz-call detections, standardized by recording effort (counts divided by effort duration in hours) at the deployment/encounter level. CalCOFI datasets (2013–04, 2008–08, 2023–11) are summarized by individual sonobuoy deployment (x-axis labeled by deployment ID), while CHNMS 2023 is summarized over verified encounter windows (5-hrs) through time. Rates are shown as lines with markers to highlight variability in detection outcomes among deployments/encounters and differences in error structure across datasets.

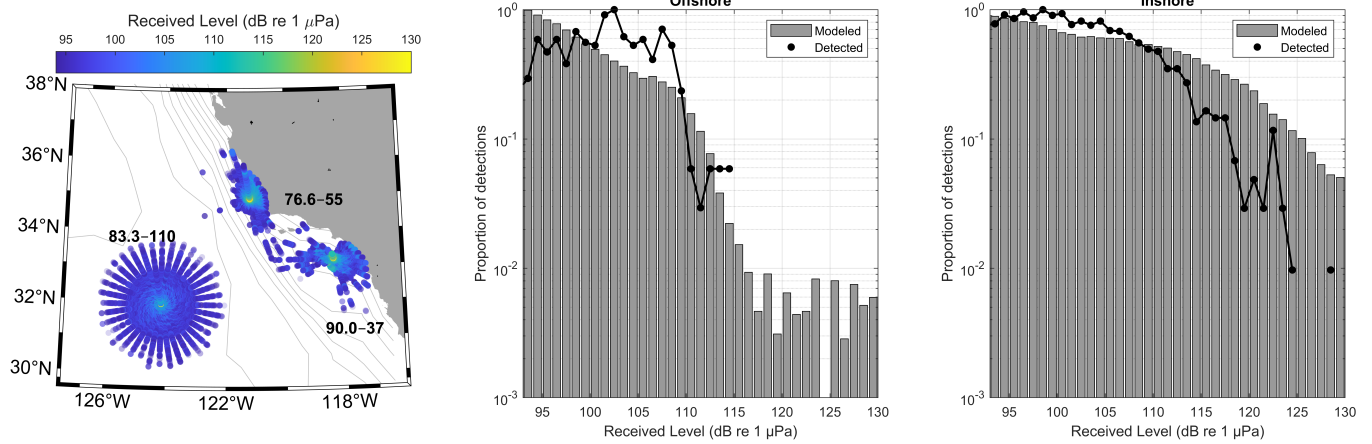

**Supplementary Figure S 9.** Received level distributions for fin whale 40 Hz calls used for density estimation. Left: Modeled received levels (dB re 1  $\mu$ Pa) across the southern California Current Ecosystem for representative offshore and inshore stations. Center and right: Distributions of received levels for detected calls in offshore (center) and inshore (right) environments. Gray bars show modeled received level distributions from propagation modeling, while black points show received levels from detected calls.
